# Supplementary material
Source: Frontiers journal article supplement (https://www.frontiersin.org/articles/327574)
Supplement: Image_2.PDF [file Image_2.PDF]

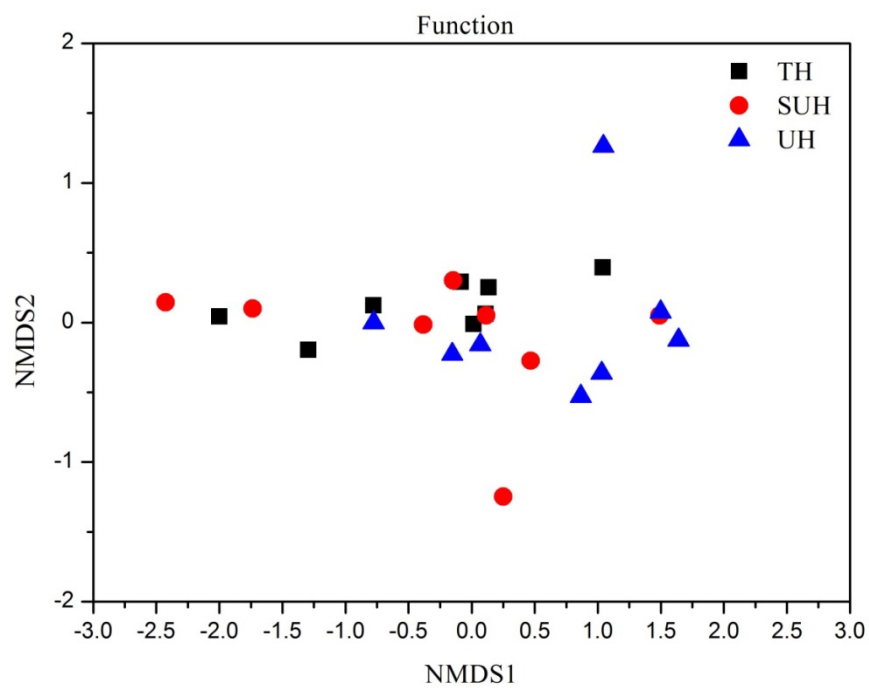

**Figure S2.** Non-metric multidimensional scaling (NMDS) plots of the Bray-Curtis dissimilarity comparing the predicted gene functions at level 3 among groups
